# Supplementary material for: A rhabdomyosarcoma hydrogel model to unveil cell-extracellular matrix interactions
Source: Royal Society of Chemistry journal article supplement (doi:10.1039/d1bm00929j), 2021-11-08
Supplement: d1bm00929j1.pdf [file d1bm00929j1.pdf]

RPPA values are directly normalized by MicroVigene 5.6.0.8 software on G

|              | <b>ROCK1</b> | <b>ROCK2</b> | <b>CDC42</b> | <b>FAK</b> | <b>ITGB1</b> | <b>nWASP</b> | <b>HSP70</b> |
|--------------|--------------|--------------|--------------|------------|--------------|--------------|--------------|
| Xeno RMS 1   | 26370        | 164391       | 105873       | 166043     | 213203       | 200787       | nv           |
| Xeno RMS 1.1 | 46630        | 200787       | 112420       | 166043     | 213203       | 189094       | 4592         |
| Xeno RMS 1.2 | 29437        | 125492       | 62318        | 124244     | 154817       | 128027       | 3047         |
| Xeno RMS 1.3 | 49513        | 211082       | 133252       | 211082     | 260407       | 221904       | 2158         |
| Xeno RMS 2   | 43478        | 185350       | 118184       | 213203     | 257816       | 235626       | nv           |
| Xeno RMS 2.1 | 47099        | 194853       | 114691       | 187213     | 302549       | 233281       | 1284         |
| Xeno RMS 2.2 | 44356        | 159532       | 110194       | 159532     | 194853       | 181680       | 8502         |
| Xeno RMS 2.3 | nv           | nv           | nv           | nv         | nv           | nv           | 703          |
| HG1          | nv           | nv           | nv           | nv         | nv           | nv           | 37049        |
| HG1.1        | 8350         | 115844       | 66171        | 43045      | 71682        | 108012       | 12481        |
| HG1.2        | nv           | nv           | nv           | nv         | nv           | nv           | 43478        |
| HG1.3        | nv           | nv           | nv           | nv         | nv           | nv           | 26635        |
| HG2          | nv           | nv           | nv           | nv         | nv           | nv           | 51534        |
| HG2.1        | nv           | nv           | nv           | nv         | nv           | nv           | 59874        |
| HG2.2        | 4113         | 80822        | 38561        | 33523      | 56387        | 82454        | 35954        |
| HG2.3        | nv           | nv           | nv           | nv         | nv           | nv           | 84965        |
| HG3          | nv           | nv           | nv           | nv         | nv           | nv           | 83283        |
| HG3.1        | 11193        | 77653        | 43045        | 35954      | 48533        | 79221        | 51534        |
| HG3.2        | 1491         | 55271        | 29437        | 18325      | 29437        | 61084        | 35596        |
| HG3.4        | 1498         | 77653        | 42617        | 30333      | 49021        | 69564        | 51021        |
| HGP1         | nv           | nv           | nv           | nv         | nv           | nv           | 70263        |
| HGP1.2       | 3605         | 138691       | 70969        | 47099      | 78433        | 181680       | 91126        |
| HGP1.3       | nv           | nv           | nv           | nv         | nv           | nv           | 121783       |
| HGP1.4       | nv           | nv           | nv           | nv         | nv           | nv           | 79221        |
| HGP2         | 56387        | 77653        | 48533        | 37049      | 68872        | 161135       | 92042        |
| HGP2.1       | 4551         | 45707        | 21634        | 16399      | 34201        | 91126        | 82454        |
| HGP2.2       | 38949        | 73130        | 47572        | nv         | 60476        | 137310       | 91126        |
| HGP2.3       | 20952        | 53637        | 25336        | 20973      | 40538        | 84965        | 60476        |
| HGP3         | nv           | nv           | nv           | nv         | nv           | nv           | 65513        |
| HGP3.1       | 7677         | 64861        | 35242        | 19673      | 31571        | 74608        | 115844       |
| HGP3.2       | nv           | 71682        | 44356        | 27447      | 55826        | 128027       | 74608        |
| HGP3.3       | nv           | nv           | nv           | nv         | nv           | nv           | 96761        |

nv: signal not verifiable.

iAPDH signals used as loading control.

**HSP90**

- 21397
- 30638
- 28567
- 29437
- 25336
- 25848
- 26108
- 24343
- 41773
- 54721
- 55826
- 42617
- 32533
- 59278
- 42617
- 52052
- 45252
- 61698
- 39735
- 54176
- 44356
- 61084
- 44356
- 36680
- 33523
- 67508
- 43478
- 50514
- 24835
- 54176
- 32860
- 46630
