# Supplementary material for: A rhabdomyosarcoma hydrogel model to unveil cell-extracellular matrix interactions
Source: Royal Society of Chemistry journal article supplement (doi:10.1039/d1bm00929j), 2021-11-08
Supplement: d1bm00929j2.pdf [file d1bm00929j2.pdf]

Saggiaro et al. Supplementary figures

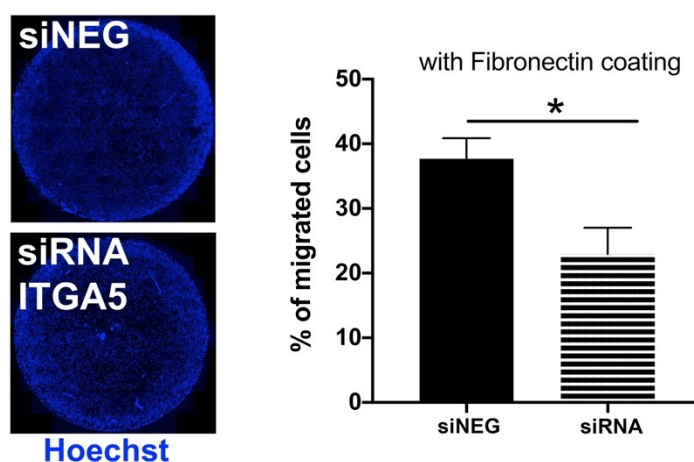

**Figure S1. Migration test with fibronectin coating.** The histogram shows percentage of migrated cells after 24 h for siNEG (black) and siRNA *ITGA5* (black lines) (N=3). Hoechst immunofluorescence staining of migrated cells on the bottom surface of the Boyden chamber has been considered.  $P < 0.05$ .

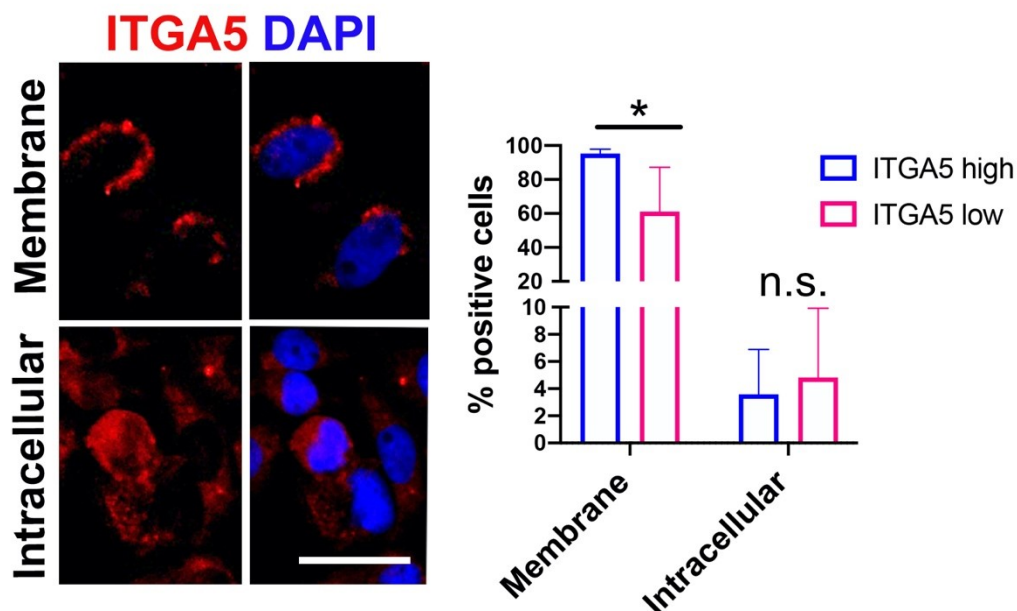

**Figure S2. Evaluation of membrane and intracellular expression of ITGA5.** ITGA5 staining on ITGA5<sup>high</sup> and <sup>low</sup> at passage zero. Scale bar: 50  $\mu$ m.  $p < 0.05$ . n.s.= not significant.

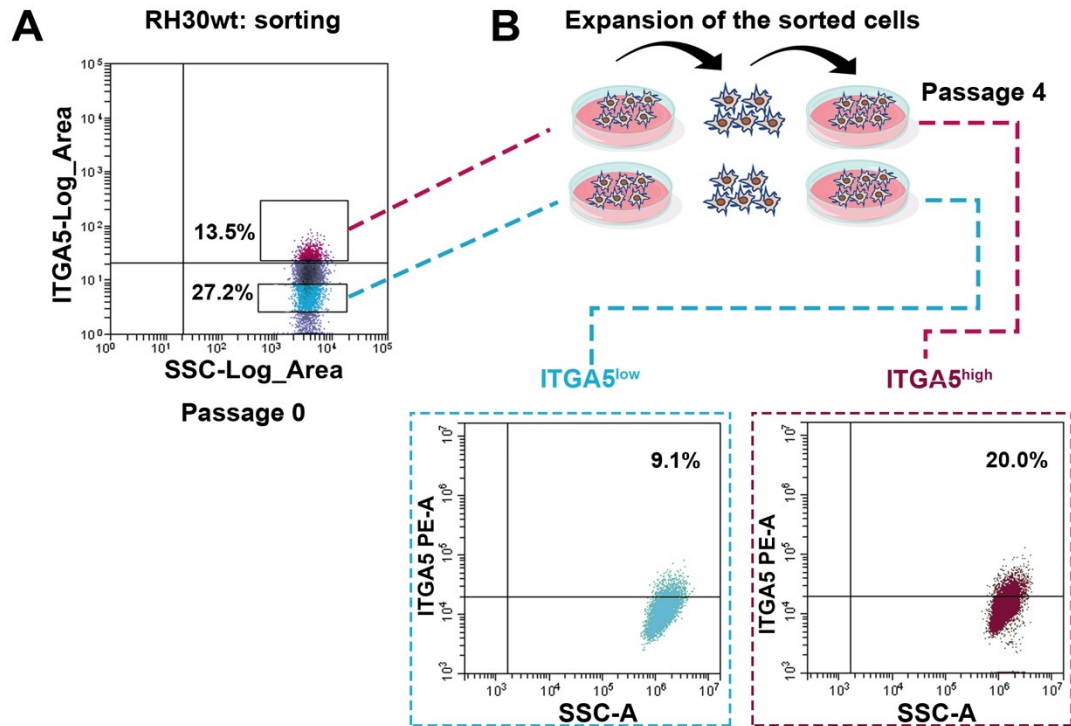

**Figure S3.** ITGA5<sup>high</sup> and ITGA5<sup>low</sup> expression during time. **A.** Sorting of the two population of RH30 cells. **B.** Cytograms showing the percentage of ITGA5 maintained in the two cell populations after 4 passages in culture. **C.** ITGA5 staining on ITGA5<sup>high</sup> and <sup>low</sup> at passage zero.

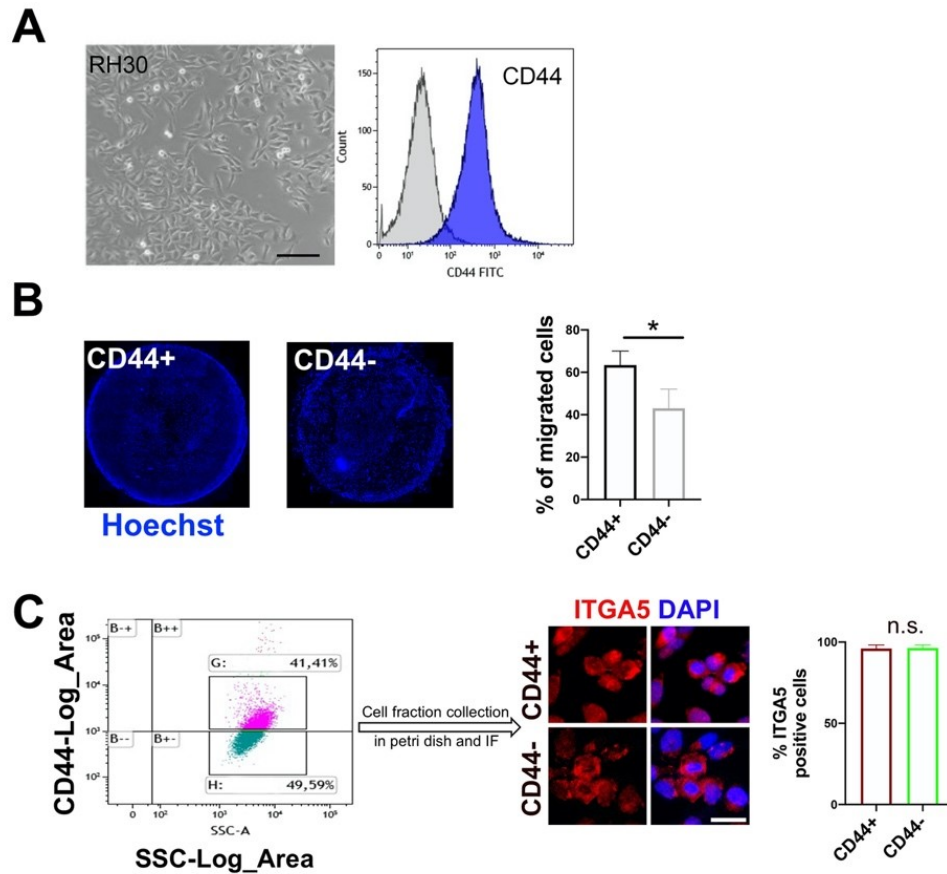

**Figure S4. RH30 and CD44 expression.** **A.** Phase contrast of RH30 cells (**left**). Cytofluorimetric expression of CD44, the hyaluronic acid (HA) receptor (**right**). **B.** RH30 cells stained for CD44 were sorted. Two fractions, CD44+, CD44-, were collected and plated (**left**). 72 hours from the sorting, ITGA5 IF was performed in both cell population (**right**). **B.** Migration assay of RH30 CD44+ and RH40 CD44- cells. CD44+ possess higher migration ability. Scale bar: 50  $\mu$ m.  $p < 0.05$ . n.s.= not significant.

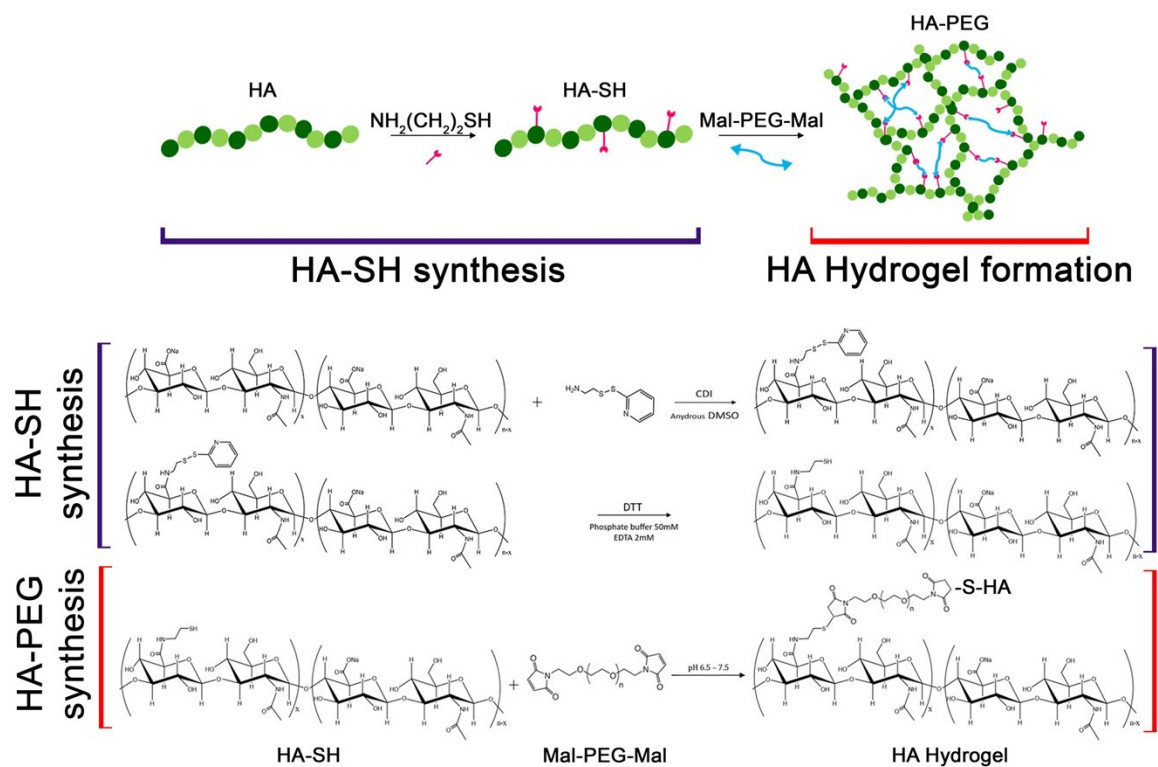

**Figure S5.** Scheme of hydrogel synthesis.

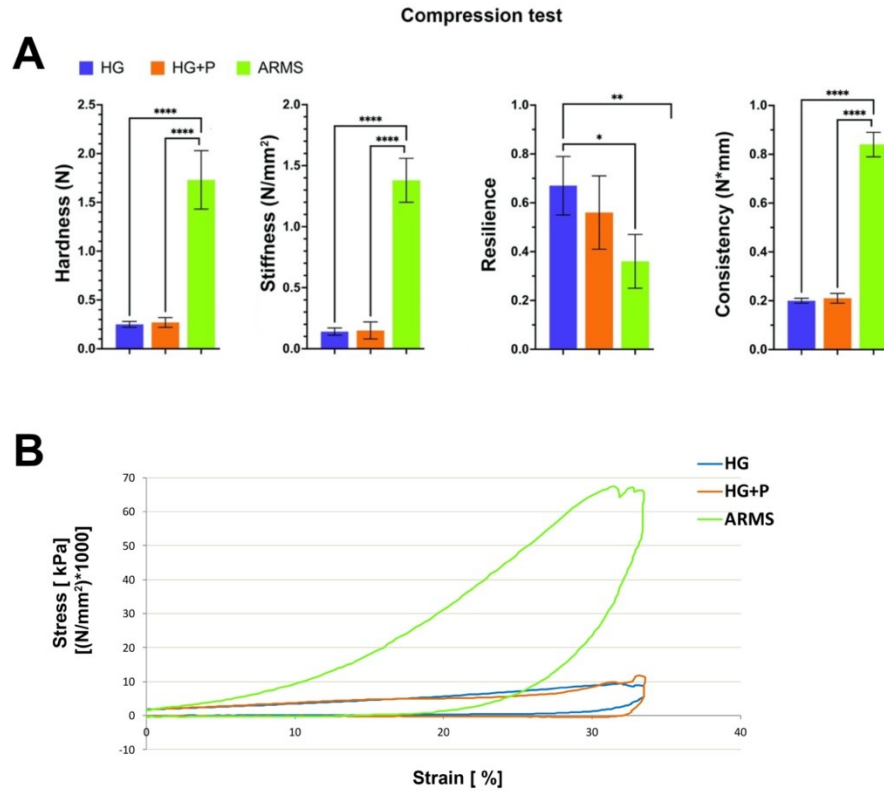

**Figure S6. A** Rheological characterization of HG, HG+P, ARMS xenogeneic tissue. \*:p<0.05, \*\*:p<0.01, \*\*\*\*:p<0.0001. **B** Stress and strain curves. Stress: force/area of sample. Strain: percentage of deformability (displacement/ high of the samples).

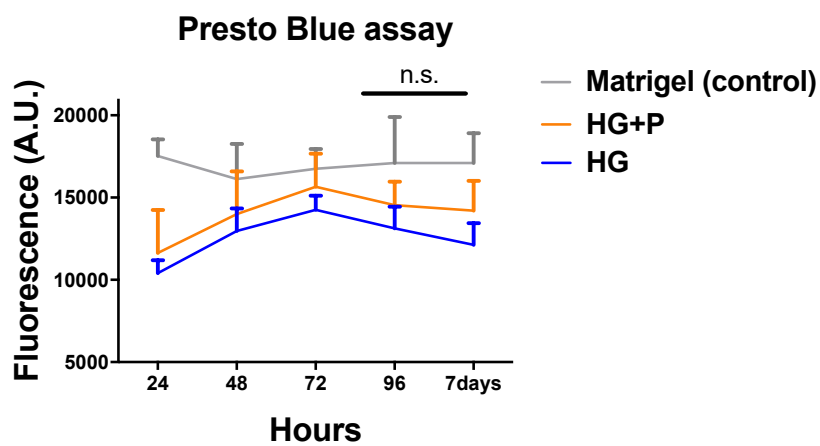

**Figure S7. Viability test on Matrigel, HG and HG+P with RH30 cells.** Presto Blued assay underlined the good viability of cells in HG and HG+P conditions. Not significant differences have been found comparing the cell viability in the Matrigel control condition. n.s.= not significant.

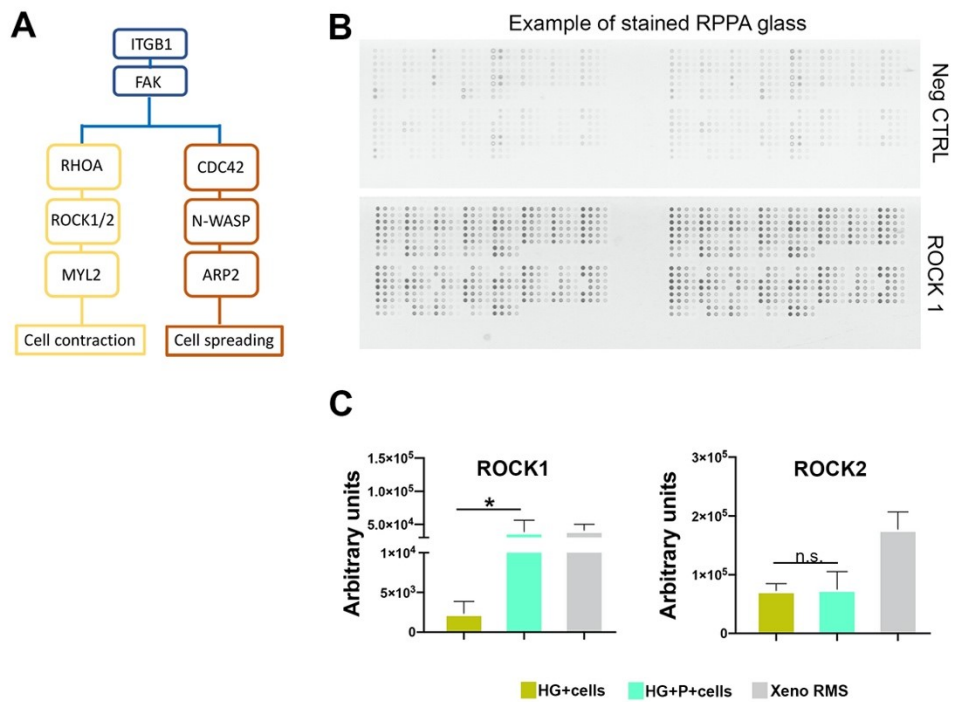

**Figure S8. A.** Cartoon of the Rho pathway. **B.** Example of stained RPPA glass with dots of DBA. Negative control and positive antibody staining for ROCK1. **C.** ROCK1 and ROCK2 protein expression. RPPA values are directly normalized by MicroVigene 5.6.0.8 software on GAPDH signals used as loading control. \*:  $p < 0.05$ . n.s.: not significant.
